# Supplementary material for: Prognostic Significance of Cardiac Magnetic Resonance in Left Atrial and Biventricular Strain Analysis during the Follow-Up of Suspected Myocarditis
Source: MDPI journal article supplement (doi:10.3390/jcm12020457), 2023-01-06
Supplement: s1 [file s1]

### **Detailed scanning parameters of 3 vendors**

**Machine 1(Philips):** 32-channel cardiac surface phased-array coil, parallel imaging technique was used, PE=2. FOV was adapted to the patient size. Mean RR was about 0.6-1.0s depending on the heart rate.

**T2WI-STIR images:** black blood T2-weighted imaging short Tau inversion recovery (T2 STIR) sequence. TR=1250, TE=75, matrix=224 mm×228 mm, flip angle=45°, slice thickness=8-10 mm, gap=0 mm.

**Cine images:** Balanced steady-state free precession(bSSFP) sequence. TR=2.9, TE=1.45, matrix=152 mm×150 mm, flip angle=45°, slice thickness=8-10 mm, gap=0 mm, bandwidth=2284.1 Hz/pixel, number of heart beat was 5-10 per apnea depending on the heart rate. 30 phases per cardiac cycle. 25 views per segment.

**LGE image:** Phase-sensitive inversion recovery sequence(PSIR) sequence. TR=6.1, TE=3.0, matrix=220 mm×160 mm, flip angle=25°, slice thickness=8-10 mm, gap=0 mm, bandwidth=228.2 Hz/pixel, number of heart beat was 6-12 per apnea depending on the heart rate. 30 views per segment.

**Machine 2(Siemens):** 32-channel cardiac surface phased-array coil, parallel imaging technique was used, PE=2. FOV was adapted to the patient size. Mean RR was about 0.6-1.0s depending on the heart rate.

**T2WI-STIR images:** black blood T2-weighted imaging short Tau inversion recovery (T2 STIR) sequence. TR=800, TE=72, matrix=256 mm×256 mm, flip angle=45°, slice thickness=8-10 mm, gap=0 mm.

**Cine images:** True fast imaging with steady-state precession sequence. TR=2.7, TE=1.35, matrix=256 mm×256 mm, flip angle=50°, slice thickness=8-10 mm, gap=0 mm, bandwidth=814 Hz/pixel, 25 phases per cardiac cycle, number of heart beat was 5-10 per apnea depending on the heart rate. 30 views per segment.

**LGE image:** Phase-sensitive inversion recovery sequence(PSIR) sequence. TR=5.4, TE=2.7, matrix=370 mm×350 mm, flip angle=20°, slice thickness=8-10 mm, gap=0 mm, bandwidth=465 Hz/pixel, number of heart beat was 6-12 per apnea depending on the heart rate. 35 views per segment.

**Machine 3(GE Healthcare):** 32-channel cardiac surface phased-array coil, parallel imaging technique was used, PE=2. FOV was adapted to the patient size. Mean RR was about 0.6-1.0s depending on the heart rate.

**T2WI-STIR images:** black blood T2-weighted imaging short Tau inversion recovery (T2 STIR) sequence. TR=1690, TE=68, matrix=160 mm×192 mm, flip angle=45°, slice thickness=8-10 mm, gap=0 mm.

**Cine images:** Fast imaging employing steady state acquisition sequence. TR=3.6, TE=1.8, matrix=256 mm×192 mm, flip angle=60°, slice thickness=8-10 mm, gap=0 mm, bandwidth=100 Hz/pixel, 25 phases per cardiac cycle, number of heart beat was 5-10 per apnea depending on the heart rate. 20-24 views per segment.

**LGE images:** Phase-sensitive inversion recovery sequence(PSIR) sequence. TR=5.3, TE=2.5, matrix=220 mm×192 mm, flip angle=35°, slice thickness=8-10 mm, gap=0 mm, bandwidth=41.67 Hz/pixel, number of heart beat was 6-12 per apnea

depending on the heart rate. 24 views per segment.

**Table S1. Intra-observer and inter-observer variability of different strain parameters**

| Parameter                  | Variability    | ICC   | 95% CI      |
|----------------------------|----------------|-------|-------------|
| LVGRS                      | Intra-observer | 0.982 | 0.947-0.994 |
|                            | Inter-observer | 0.944 | 0.834-0.982 |
| LVGCS                      | Intra-observer | 0.980 | 0.940-0.993 |
|                            | Inter-observer | 0.958 | 0.875-0.986 |
| LVGLS                      | Intra-observer | 0.984 | 0.952-0.995 |
|                            | Inter-observer | 0.966 | 0.900-0.989 |
| RVGRS                      | Intra-observer | 0.974 | 0.922-0.991 |
|                            | Inter-observer | 0.946 | 0.843-0.922 |
| RVGCS                      | Intra-observer | 0.979 | 0.935-0.993 |
|                            | Inter-observer | 0.922 | 0.782-0.974 |
| RVGLS                      | Intra-observer | 0.987 | 0.960-0.996 |
|                            | Inter-observer | 0.972 | 0.916-0.991 |
| LA $\epsilon$ <sub>s</sub> | Intra-observer | 0.984 | 0.952-0.995 |
|                            | Inter-observer | 0.968 | 0.905-0.990 |
| LA $\epsilon$ <sub>a</sub> | Intra-observer | 0.898 | 0.718-0.966 |
|                            | Inter-observer | 0.818 | 0.539-0.937 |
| LA $\epsilon$ <sub>e</sub> | Intra-observer | 0.977 | 0.931-0.993 |

|       |                |       |             |
|-------|----------------|-------|-------------|
| LASRs | Inter-observer | 0.936 | 0.818-0.979 |
|       | Intra-observer | 0.903 | 0.727-0.968 |
| LASRe | Inter-observer | 0.815 | 0.523-0.936 |
|       | Intra-observer | 0.964 | 0.896-0.988 |
| LASRa | Inter-observer | 0.950 | 0.856-0.984 |
|       | Intra-observer | 0.827 | 0.558-0.940 |
|       | Inter-observer | 0.757 | 0.416-0.914 |

**Table S2. Univariate association of the second laboratory and CMR parameters with MACE**

| Parameter                      | HR (95% CI)           | P value |
|--------------------------------|-----------------------|---------|
| Peak level CK (U/L)            | 0.999 (0.995, 1.002)  | 0.470   |
| Peak level hs-TNI(ng/mL)       | 0.961 (0.828, 1.115)  | 0.601   |
| Peak level NT-proBNP(pg/mL)    | 1.000 (1.000, 1.001)  | 0.322   |
| Peak level CRP(mg/L)           | 1.018 (0.959, 1.080)  | 0.555   |
| WBC count(*10 <sup>9</sup> /L) | 1.030 (0.894, 1.187)  | 0.682   |
| Positive T2WI                  | 0.898 (0.256, 3.155)  | 0.867   |
| Positive LGE                   | 0.680 (0.236, 1.964)  | 0.477   |
| Positive “LLC”                 | 0.042 (0.000, 41.633) | 0.367   |
| LVEF, %                        | 0.961 (0.909, 1.017)  | 0.168   |
| RVEF, %                        | 0.979 (0.944, 1.016)  | 0.267   |

|                      |                      |       |
|----------------------|----------------------|-------|
| LAEF, %              | 0.975 (0.937, 1.014) | 0.210 |
| LAPEF, %             | 1.008 (0.958, 1.061) | 0.748 |
| LAAEF, %             | 1.012 (0.980, 1.045) | 0.475 |
| LVGRS, %             | 0.986 (0.937, 1.038) | 0.593 |
| LVGCS, %             | 1.092 (0.939, 1.271) | 0.253 |
| LVGLS, %             | 0.991 (0.873, 1.125) | 0.888 |
| RVGRS, %             | 1.012 (0.987, 1.038) | 0.334 |
| RVGCS, %             | 0.983 (0.934, 1.035) | 0.521 |
| RVGLS, %             | 1.020 (0.975, 1.067) | 0.400 |
| $\epsilon_s$ , %     | 1.000 (0.957, 1.046) | 0.984 |
| $\epsilon_a$ , %     | 1.032 (0.955, 1.115) | 0.431 |
| $\epsilon_e$ , %     | 0.984 (0.925, 1.046) | 0.603 |
| SRs, s <sup>-1</sup> | 0.818 (0.370, 1.809) | 0.620 |
| SRe, s <sup>-1</sup> | 1.148 (0.682, 1.933) | 0.604 |
| SRa, s <sup>-1</sup> | 0.986 (0.535, 1.818) | 0.964 |

---
